# Supplementary material for: Single-cell triple omics sequencing reveals genetic, epigenetic, and transcriptomic heterogeneity in hepatocellular carcinomas
Source: PubMed Central journal article supplement (PMC4783472; doi:10.1038/cr.2016.23), 2016-02-23
Supplement: cr201623x4.pdf [file cr201623x4.pdf]

## Supplementary Figure 2

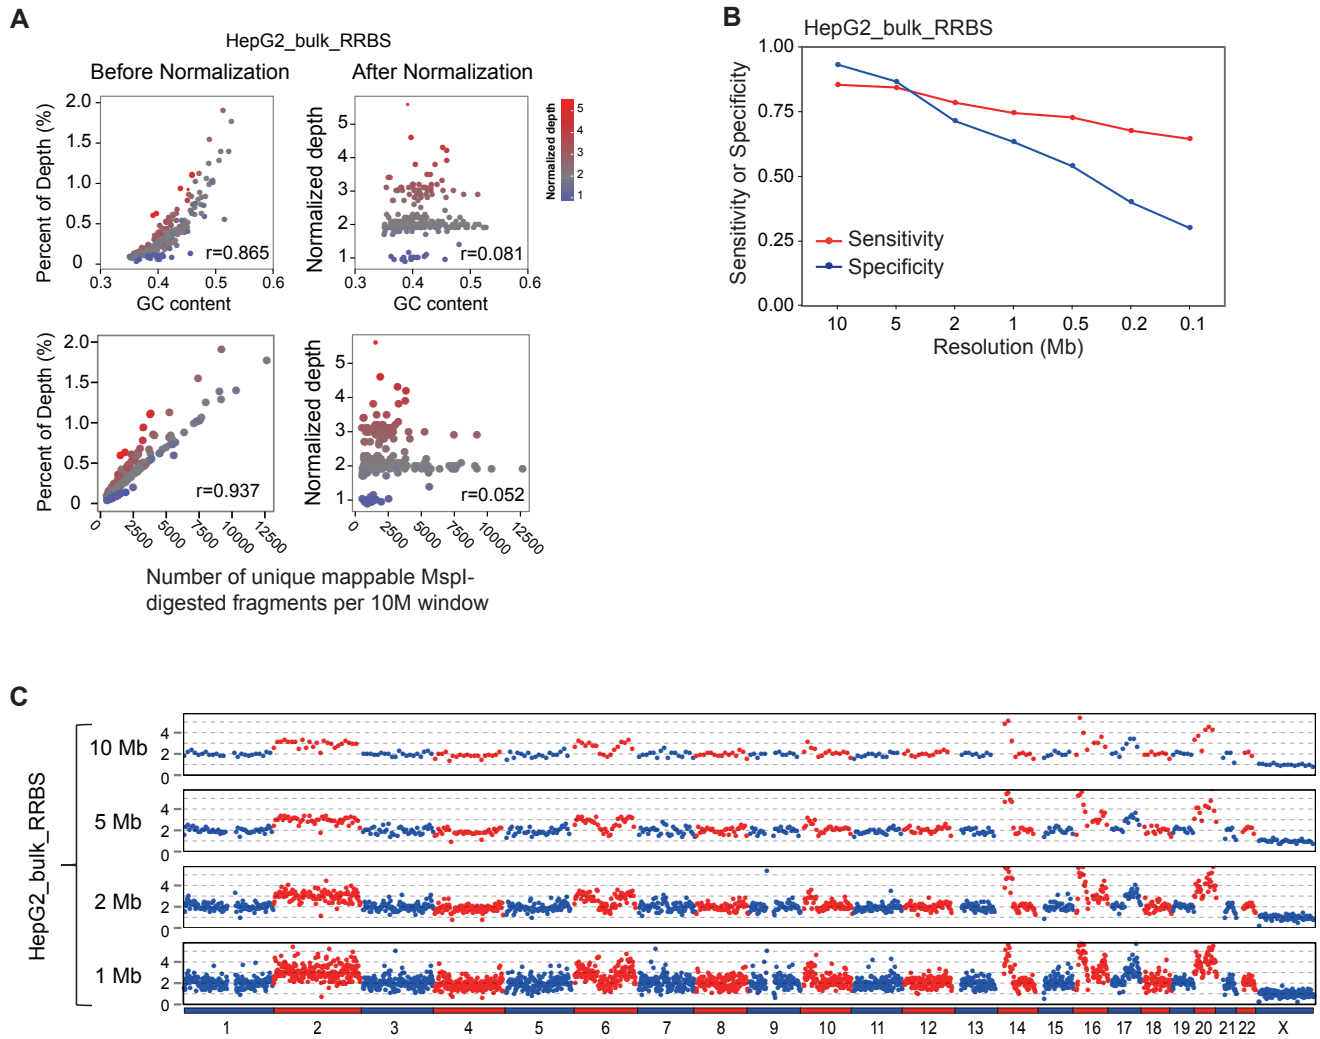

### Supplementary information, Figure S2. CNV deduction using bulk RRBS data of HepG2 cells

**(A)** The strong biases of sequencing depth on GC content and MspI-digested fragments are eliminated after normalization. The resolution is 10-megabases when calculating the GC content and number of unique mappable MspI-digested fragments.

**(B)** Sensitivity and specificity of CNV deductions determined from HepG2 bulk RRBS data at different resolution levels.

**(C)** Copy number variation deduction results of HepG2 bulk RRBS data at different resolution levels.
