# Supplementary material for: Single-cell triple omics sequencing reveals genetic, epigenetic, and transcriptomic heterogeneity in hepatocellular carcinomas
Source: PubMed Central journal article supplement (PMC4783472; doi:10.1038/cr.2016.23), 2016-02-23
Supplement: cr201623x5.pdf [file cr201623x5.pdf]

### Supplementary Figure 3

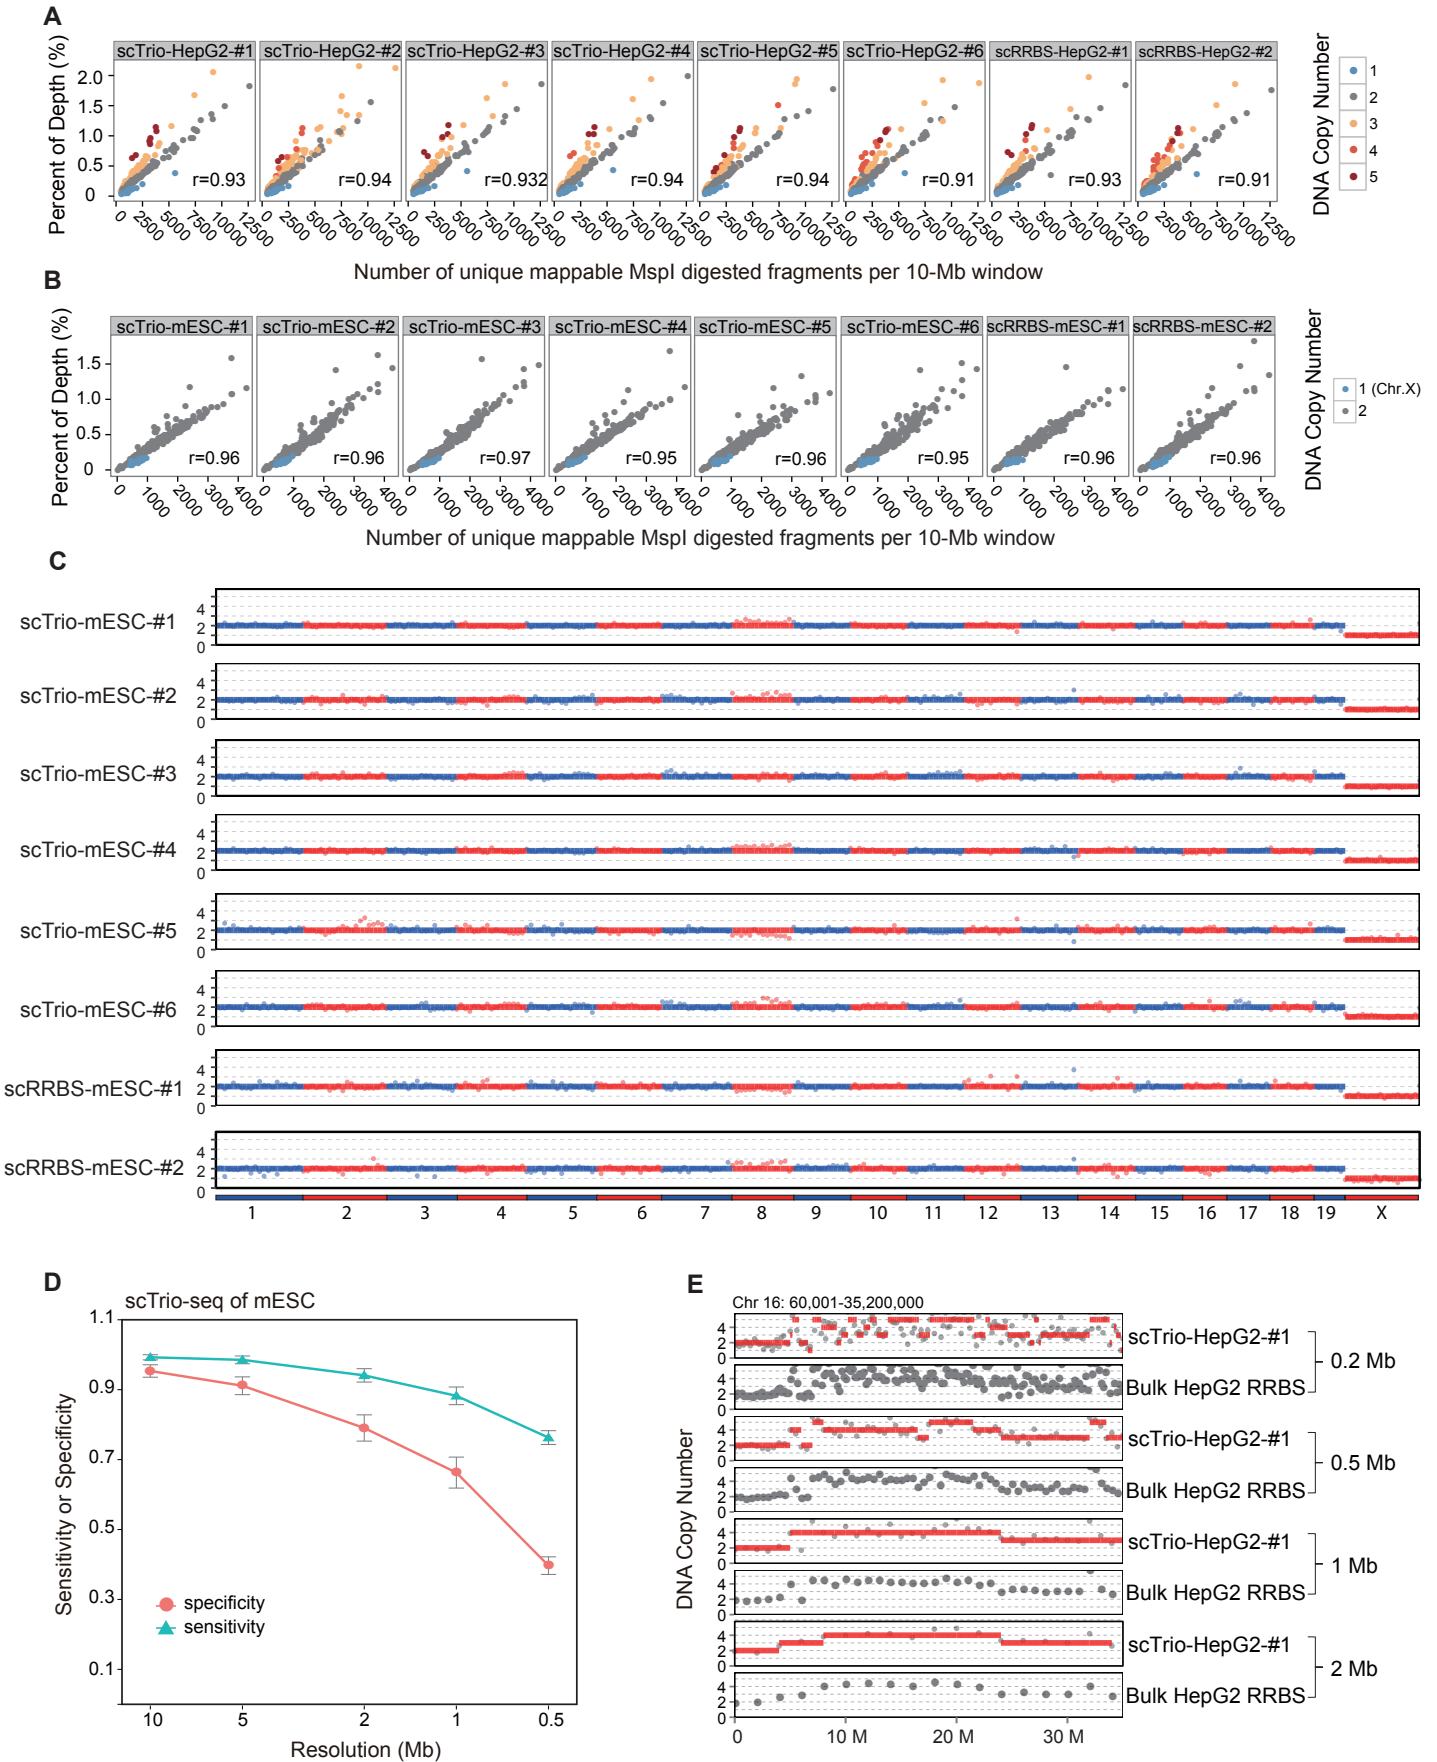

**Supplementary information, Figure S3. CNV deduction using scRRBS data and scTrio-seq data**

- (A) The correlations between the sequencing depth and the number of unique mappable MspI-digested fragments of HepG2 scTrio-seq data or scRRBS data. The resolution is 10-megabases. The regions with the copy number of one include the chromosome X.
- (B) The correlations between the sequencing depth and the number of unique mappable MspI-digested fragments of mESC scTrio-seq data or scRRBS data. The resolution is 10-megabases. The regions with the copy number of one are on chromosome X.
- (C) Copy number variation deduction results of single mESC cells at a 10-Mb resolution. The red or blue dots represent the normalized copy number values and the red or blue segments show the HMM results.
- (D) Specificity and sensitivity of CNV deductions determined from single mESC data at different resolution levels. Error bar represents the standard error of 8 mESC cells. The regions with copy number of one on chromosome X were regarded as true positive values when calculating the sensitivity.
- (E) Zoom in pictures show shorter CNV segments on the p arm of Chr. 16 in HepG2 cells. The red segments represent the HMM results in scTrio-seq data. Bulk HepG2 RRBS data was used as a standard control.
