# Supplementary material for: Single-cell triple omics sequencing reveals genetic, epigenetic, and transcriptomic heterogeneity in hepatocellular carcinomas
Source: PubMed Central journal article supplement (PMC4783472; doi:10.1038/cr.2016.23), 2016-02-23
Supplement: cr201623x13.pdf [file cr201623x13.pdf]

Supplementary Figure 11

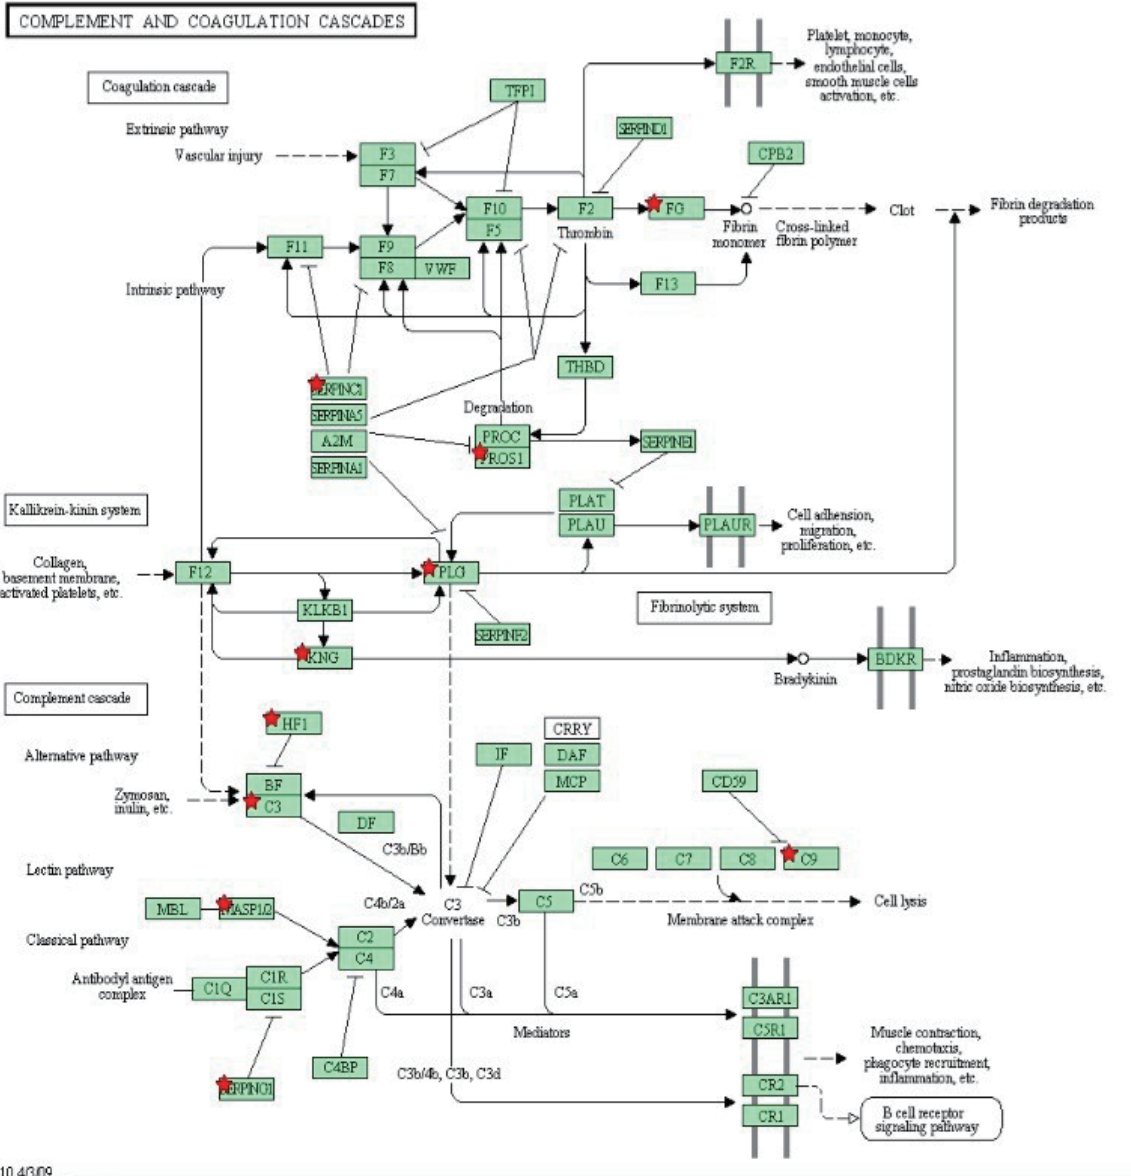

04610 4/3/09

**Supplementary information, Figure S11. Subpopulation I HCC cells lack complement and coagulation cascades pathway.**

The complement and coagulation cascades from KEGG. The genes whose expressions are down regulated in subpopulation I HCC cells are marked with red stars.
